# Supplementary material for: Polyurethanes prepared from isocyanates containing triphenylamine derivatives: synthesis and optical, electrochemical, electrochromic and memory properties
Source: Royal Society of Chemistry journal article supplement (doi:10.1039/c5ra09361a), 2015-01-01
Supplement: c5ra09361a1.pdf [file c5ra09361a1.pdf]

## Supporting Information

### **Polyurethanes prepared from isocyanate triphenylamine: Synthesis and Optical, Electrochemical, Electrochromic and Memory Properties**

**Xiaotong Wu<sup>a,1</sup>, Yanshuang Wu<sup>b,1</sup>, Chunyu Zhang<sup>a</sup>, Haijun Niu<sup>a,\*</sup>, Lei Lei<sup>b,\*</sup>, Chuanli Qin<sup>a</sup>, Cheng Wang<sup>a</sup>, Xuduo Bai<sup>a</sup>, Wen Wang<sup>c</sup>**

*a Key Laboratory of Functional Inorganic Material Chemistry, Ministry of Education; Department of Macromolecular Science and Engineering, School of Chemistry and Chemical Engineering, Heilongjiang University, Harbin 150086, P R China*

*b Department of Histology and Embryology, Harbin Medical University, Harbin,150081, Heilongjiang Province, China.*

*c School of Material Science and Engineering, Harbin Institute of Technology, Harbin 150080, P R China*

\*corresponding author, email: [haijunniu@hotmail.com](mailto:haijunniu@hotmail.com) (Haijun Niu); [leiy2002@yahoo.com](mailto:leiy2002@yahoo.com) (Lei Lei)

1. These authors contributed equally to this work

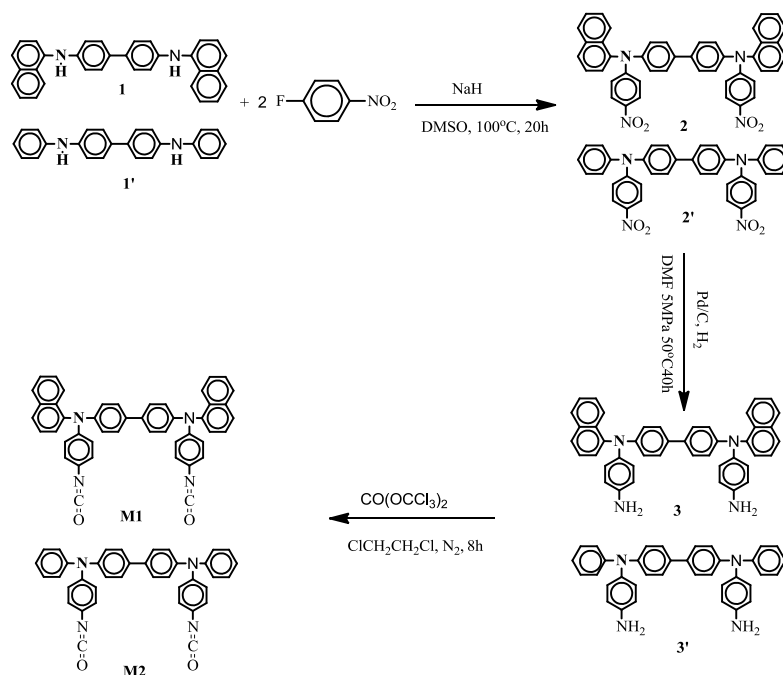

**Scheme S1** Synthesis routes of M1 and M2.

M1: FT-IR spectrum (KBr pellet,  $\text{cm}^{-1}$ ): 2261 (N=C=O stretching).  $^1\text{H-NMR}$  (400 MHz, DMSO- $d_6$ , ppm): 6.84 (d, 4H, ArH ortho to N), 6.96 (d, 4H, ArH ortho to NCO), 7.12 (m, 3H, ArH of Ph), 7.24 (m, 2H, ArH ortho to N in Ph).  $^{13}\text{C-NMR}$  (100 MHz, DMSO- $d_6$ , ppm): 120.0, 121.6, 123.2, 123.8, 125.0, 125.4, 126.2, 130.0, 139.8, 136.2, 141.4, 146.8, 148.0, 152.8 (carbon of benzene ring), 127.2 (N=C=O).

M2: FT-IR spectrum (KBr pellet,  $\text{cm}^{-1}$ ): 2268 (N=C=O stretching).  $^1\text{H-NMR}$  (400 MHz, DMSO- $d_6$ , ppm): 6.83 (d, 4H, ArH ortho to N), 6.97 (d, 4H, ArH ortho to NCO), 7.13 (m, 3H, ArH of Ph), 7.25 (m, 2H, ArH ortho to N in Ph).  $^{13}\text{C-NMR}$  (100 MHz, DMSO- $d_6$ , ppm): 117.7, 120.0, 121.2, 123.1, 124.2, 129.0, 131.0, 136.0, 142.0, 143.6, 147.9 (carbon of benzene ring), 127.6 (N=C=O).

**PU (M1)-a**: FT-IR spectrum (KBr pellet,  $\text{cm}^{-1}$ ): 3230 (N-H stretching), 1658 (C=O stretching), 1014 (N-CO-O stretching band), 1538 (C-N stretching and N-H bending), 1275 (C-N-H combination), 1593, 1505, 756 (aromatic ring of benzene).  $^1\text{H-NMR}$  (400 MHz, DMSO- $d_6$ ,

ppm): 7.95 (d, NH-COO), 6.75 (m, aromatic ring of benzene N), 7.67-7.21 (m, aromatic ring of TPA). <sup>13</sup>C-NMR (100 MHz, DMSO-d<sub>6</sub>, ppm): 92.0 (°C), 115.9, 120.1, 123.2, 123.8, 125.0, 126.0, 127.2, 128.2, 129.0, 131.8, 135.9, 138.2, 142.2, 146.2, 147.8, 151.0, 153.0, 152.7 (carbon of benzene ring), 158.1 (C=O).

**PU (M1)-b:** FT-IR spectrum (KBr pellet, cm<sup>-1</sup>): 3285 (N-H stretching), 1660 (C=O stretching), 1014 (N-CO-O stretching band), 1538 (C-N stretching and N-H bending), 1272 (C-N-H combination), 1593, 1505, 755 (aromatic ring of benzene). <sup>1</sup>H-NMR (400 MHz, DMSO-d<sub>6</sub>, ppm): 7.95 (d, NH-COO), 6.64 (m, aromatic ring of benzene N), 7.61-7.22 (m, aromatic ring of TPA). <sup>13</sup>C-NMR (100 MHz, DMSO-d<sub>6</sub>, ppm): 31.2 (-CH<sub>3</sub>), 40.1(°C), 115.0, 120.2, 121.9, 123.6, 123.9, 126.1, 128.0, 130.1, 133.9, 141.5, 141.8, 142.2, 146.2, 147.9, 148.4, -155.8 (carbon of benzene ring), 152.1 (C=O).

**PU (M1)-c:** FT-IR spectrum (KBr pellet, cm<sup>-1</sup>): 3261 (N-H stretching), 1659 (C=O stretching), 1014 (N-CO-O stretching band), 1536 (C-N stretching and N-H bending), 1262 (C-N-H combination), 1594, 1502, 775 (aromatic ring of benzene). <sup>1</sup>H-NMR (400 MHz, DMSO-d<sub>6</sub>, ppm): 7.95 (d, NH-COO), 6.79 (m, aromatic ring of benzene N), 7.51-7.21 (m, aromatic ring of TPA). <sup>13</sup>C-NMR (100 MHz, DMSO-d<sub>6</sub>, ppm): 116.0, 120.2, 123.5, 126.1, 127.2, 128.1, 129.0, 131.9, 133.9, 156.4 (carbon of benzene ring), 147.8 (C=O)

**PU (M1)-d:** FT-IR spectrum (KBr pellet, cm<sup>-1</sup>): 3247 (N-H stretching), 1658 (C=O stretching), 1014 (N-CO-O stretching band), 1542 (C-N stretching and N-H bending), 1278 (C-N-H combination), 1604, 1505, 772 (aromatic ring of benzene). <sup>1</sup>H-NMR (400 MHz, DMSO-d<sub>6</sub>, ppm): 7.95 (d, NH-COO), 6.88 (m, aromatic ring of benzene N), 7.62-7.58 (m, aromatic ring of TPA). <sup>13</sup>C-NMR (100 MHz, DMSO-d<sub>6</sub>, ppm): 115.9, 120.0, 122.0, 123.0, 126.2, 127.2,

128.2, 129.2, 131.4, 132.5, 135.6, 141.6, 147.9 (carbon of benzene ring), 153.9 (C=O), 161.9 (°C).

**PU (M1)-e:** FT-IR spectrum (KBr pellet,  $\text{cm}^{-1}$ ): 3254 (N-H stretching), 1660 (C=O stretching), 1014 (N-CO-O stretching band), 1538 (C-N stretching and N-H bending), 1270 (C-N-H combination), 1593, 1508, 747 (aromatic ring of benzene).  $^1\text{H-NMR}$  (400 MHz,  $\text{DMSO-d}_6$ , ppm): 7.95 (d, NH-COO), 6.87 (m, aromatic ring of benzene N), 7.43-7.26 (m, aromatic ring of TPA).  $^{13}\text{C-NMR}$  (100 MHz,  $\text{DMSO-d}_6$ , ppm): 115.8, 120.2, 122.1, 123.6, 123.8, 126.1, 127.8, 129.0, 130.0, 133.9, 135.9, 136.2, 140.0, 143.8, 146.8, 147.8, 149.9 (carbon of benzene ring), 152.1 (C=O), 156.2 (°C).

**PU (M2)-a:** FT-IR spectrum (KBr pellet,  $\text{cm}^{-1}$ ): 3253 (N-H stretching), 1660 (C=O stretching), 1015 (N-CO-O stretching band), 1538 (C-N stretching and N-H bending), 1273 (C-N-H combination), 1593, 1505, 755 (aromatic ring of benzene).  $^1\text{H-NMR}$  (400 MHz,  $\text{DMSO-d}_6$ , ppm): 7.95 (d, NH-COO), 6.74 (m, aromatic ring of benzene N), 7.53-7.23 (m, aromatic ring of TPA).  $^{13}\text{C-NMR}$  (100 MHz,  $\text{DMSO-d}_6$ , ppm): 90.2 (C-O), 115.1, 120.0, 123.0, 124.0, 127.0, 128.0, 131.0, 132.0, 135.2, 144.1, 147.2, 151.2, 158.0, 162.1 (carbon of benzene ring), 169.9 (C=O).

**PU (M2)-b:** FT-IR spectrum (KBr pellet,  $\text{cm}^{-1}$ ): 3261 (N-H stretching), 1662 (C=O stretching), 1002 (N-CO-O stretching band), 1544 (C-N stretching and N-H bending), 1270 (C-N-H combination), 1593, 1507, 751 (aromatic ring of benzene).  $^1\text{H-NMR}$  (400 MHz,  $\text{DMSO-d}_6$ , ppm): 7.95 (d, NH-COO), 6.68 (m, aromatic ring of benzene N), 7.56-7.21 (m, aromatic ring of TPA).  $^{13}\text{C-NMR}$  (100 MHz,  $\text{DMSO-d}_6$ , ppm): 31.2 ( $-\text{CH}_3$ ), 39.4 ( $^{\text{P}}\text{C}$ ), 115.5, 120.0, 120.2, 121.8, 124.0, 127.0, 129.0, 131.0, 134.8, 140.4, 141.8, 143.6, 148.2, 156.0 (carbon of

benzene ring), 152.1 (C=O).

**PU (M2)-c:** FT-IR spectrum (KBr pellet,  $\text{cm}^{-1}$ ): 3255 (N-H stretching), 1660 (C=O stretching), 1027 (N-CO-O stretching band), 1536 (C-N stretching and N-H bending), 1265 (C-N-H combination), 1592, 1493, 752 (aromatic ring of benzene).  $^1\text{H-NMR}$  (400 MHz,  $\text{DMSO-d}_6$ , ppm): 7.95 (d, NH-COO), 6.79 (m, aromatic ring of benzene N), 7.38-7.34 (m, aromatic ring of TPA).  $^{13}\text{C-NMR}$  (100 MHz,  $\text{DMSO-d}_6$ , ppm): 115.1, 120.1, 120.6, 124.2, 127.5, 128.0, 129.2, 131.2, 132.0, 135.4, 143.0, 147.5, 156.4 (carbon of benzene ring), 152.1 (C=O).

**PU (M2)-d:** FT-IR spectrum (KBr pellet,  $\text{cm}^{-1}$ ): 3258 (N-H stretching), 1659 (C=O stretching), 1099 (N-CO-O stretching band), 1536 (C-N stretching and N-H bending), 1276 (C-N-H combination), 1604, 1505, 751 (aromatic ring of benzene).  $^1\text{H-NMR}$  (400 MHz,  $\text{DMSO-d}_6$ , ppm): 7.95 (d, NH-COO), 6.88 (m, aromatic ring of benzene N), 7.62-7.28 (m, aromatic ring of TPA).  $^{13}\text{C-NMR}$  (100 MHz,  $\text{DMSO-d}_6$ , ppm): 45.5 ( $^{\text{P}}\text{C}$ ), 115.5, 120.0, 120.5, 122.2, 124.0, 127.0, 128.4, 162.1 (carbon of benzene ring), 152.2 (C=O).

**PU (M2)-e:** FT-IR spectrum (KBr pellet,  $\text{cm}^{-1}$ ): 3259 (N-H stretching), 1660 (C=O stretching), 1005 (N-CO-O stretching band), 1543 (C-N stretching and N-H bending), 1270 (C-N-H combination), 1592, 1509, 748 (aromatic ring of benzene).  $^1\text{H-NMR}$  (400 MHz,  $\text{DMSO-d}_6$ , ppm): 7.95 (d, NH-COO), 6.88 (m, aromatic ring of benzene N), 7.52-7.26 (m, aromatic ring of TPA).  $^{13}\text{C-NMR}$  (100 MHz,  $\text{DMSO-d}_6$ , ppm): 115.1, 121.0, 127.0, 128.0, 129.2, 136.8, 140.0, 152.4, -163.0 (carbon of benzene ring), 156.0 (C=O).

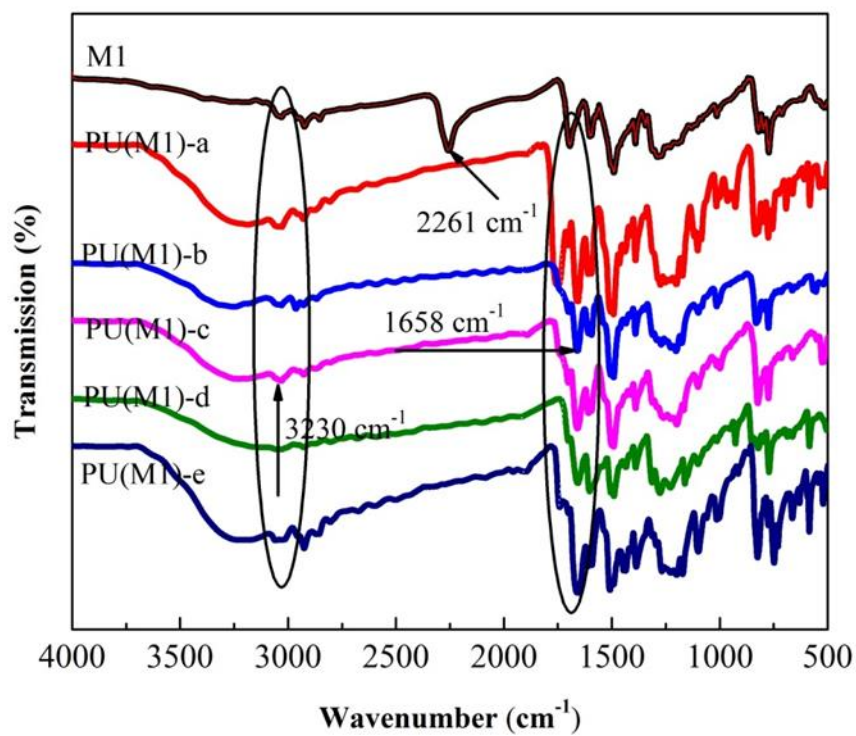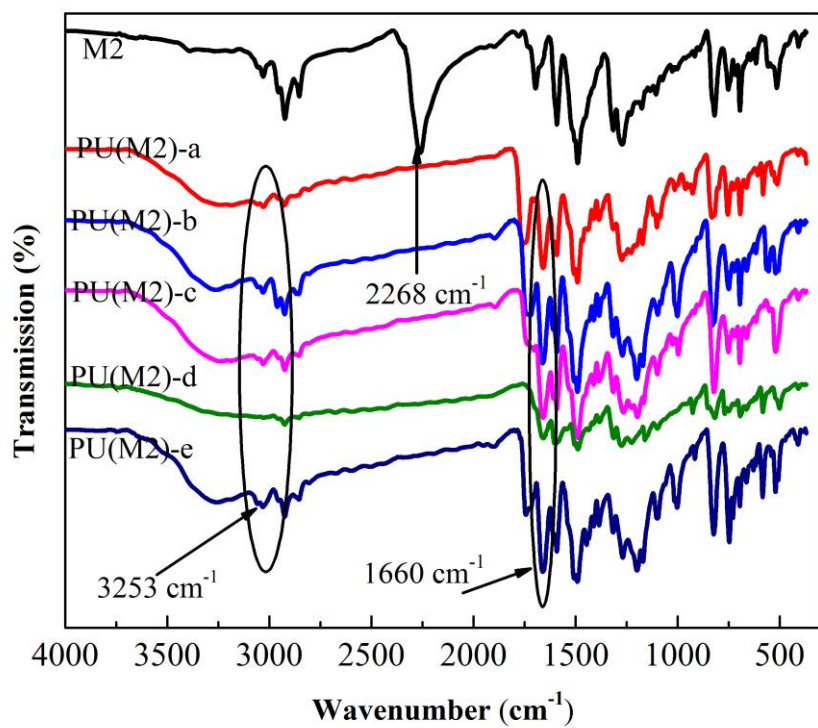

**Fig. S1** FT-IR spectra of M1, M2, PUs (M1) and PUs (M2).

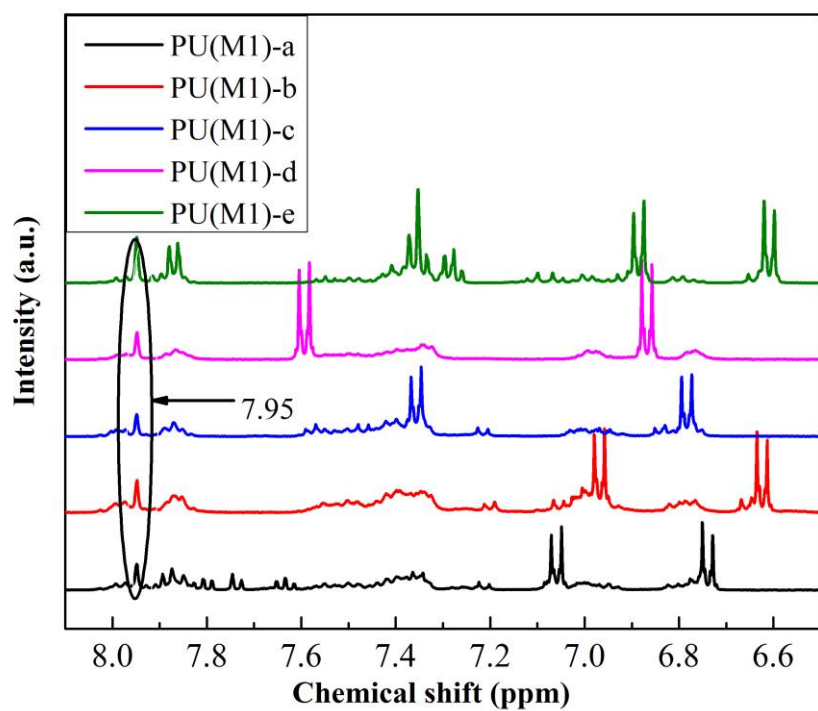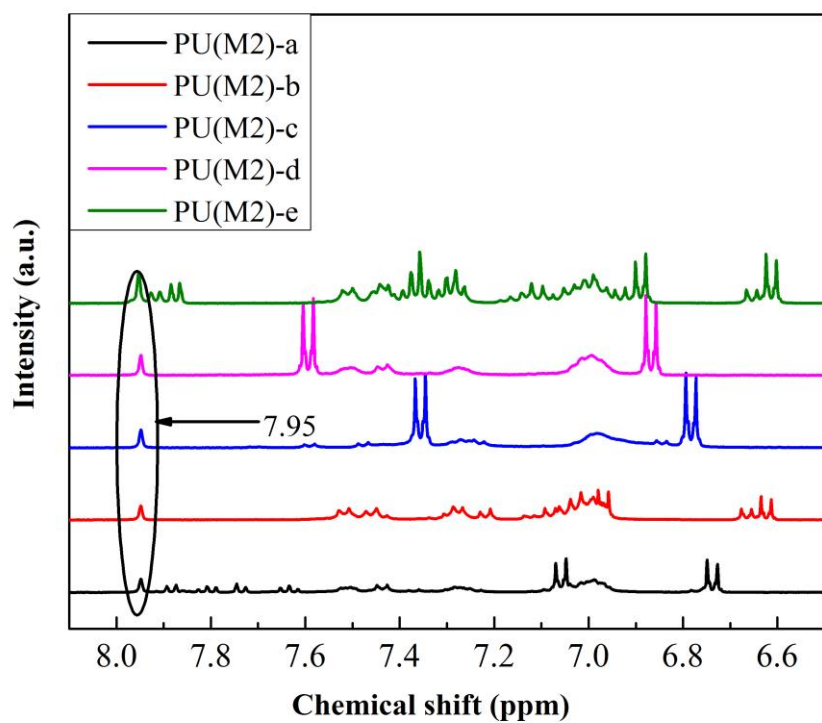

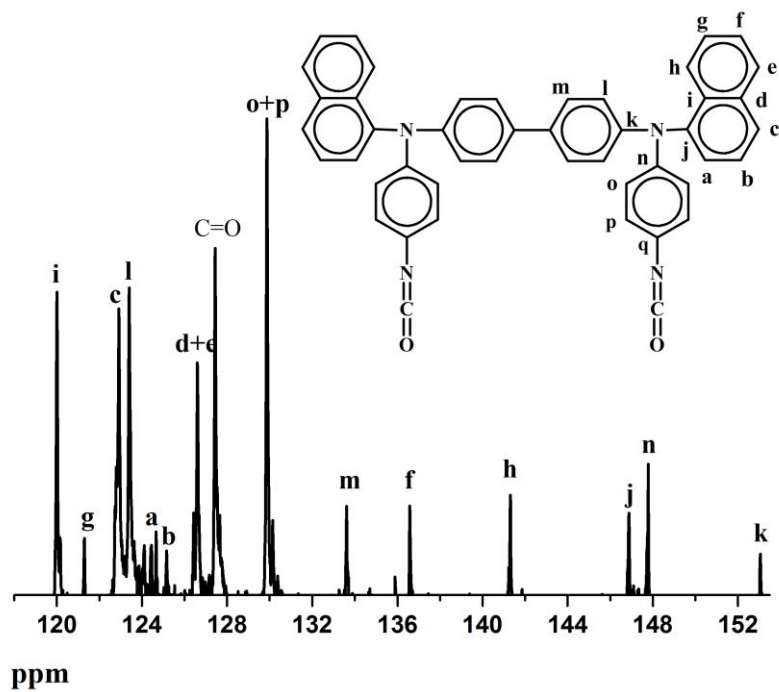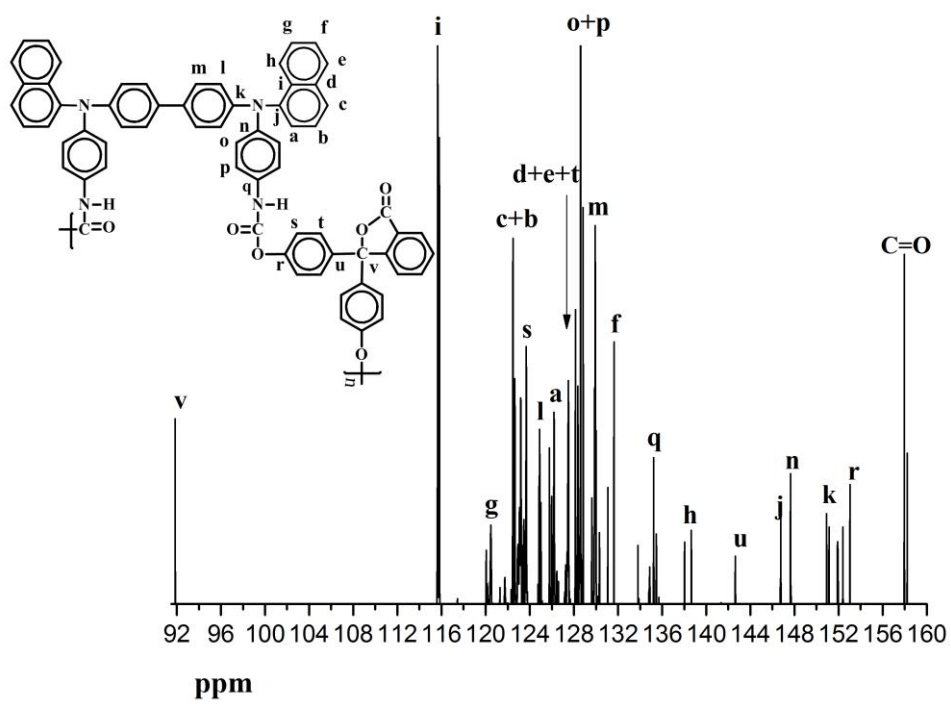



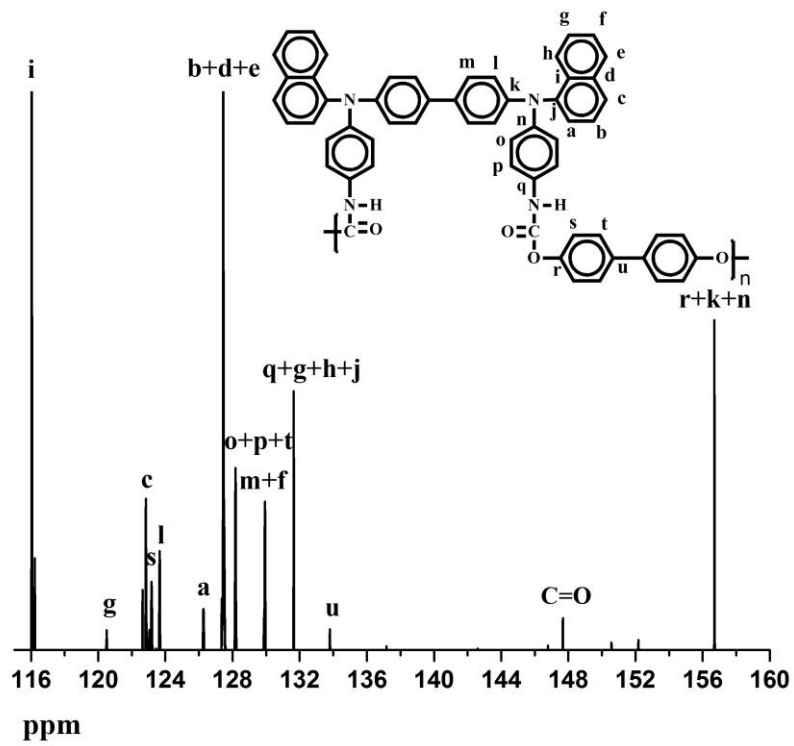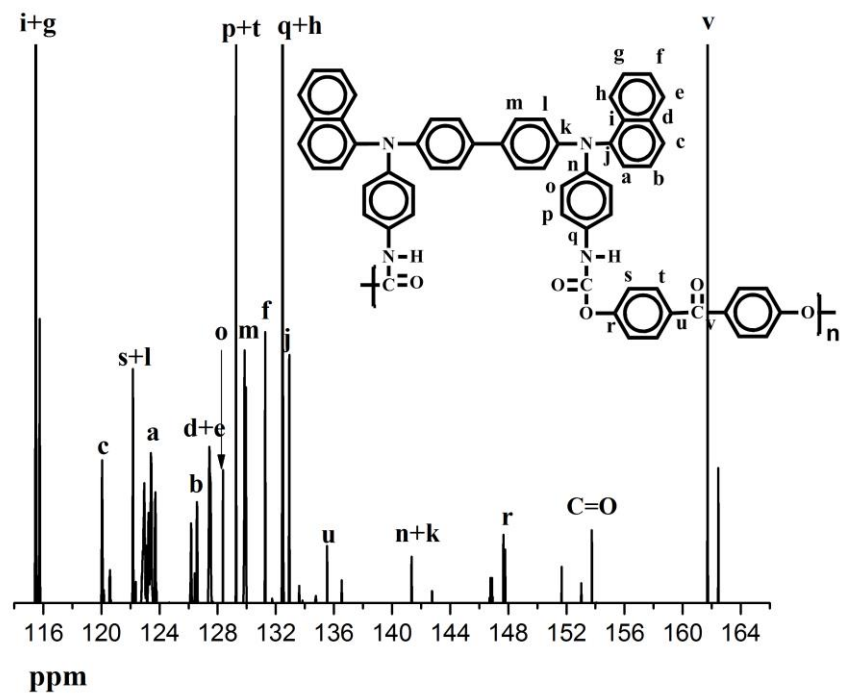

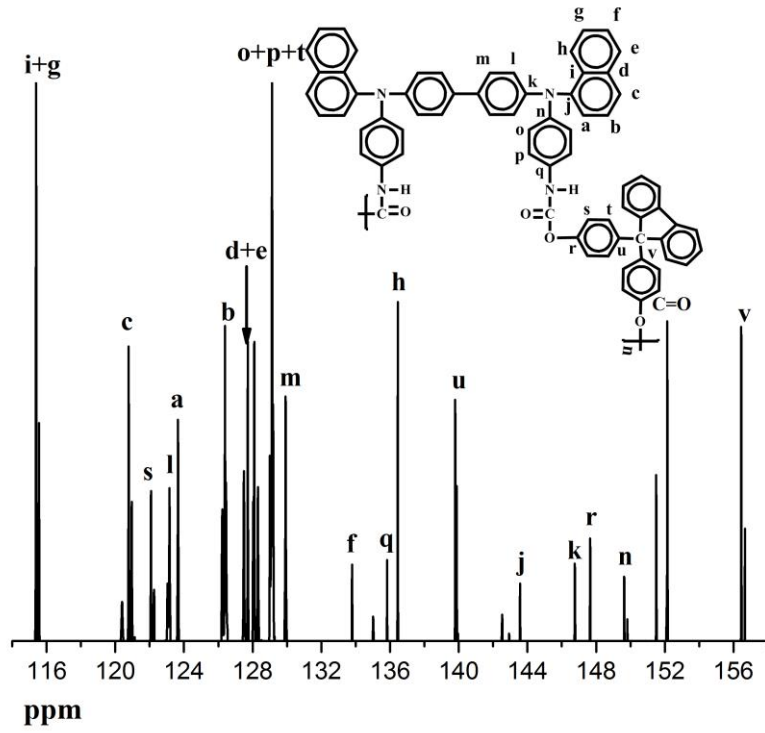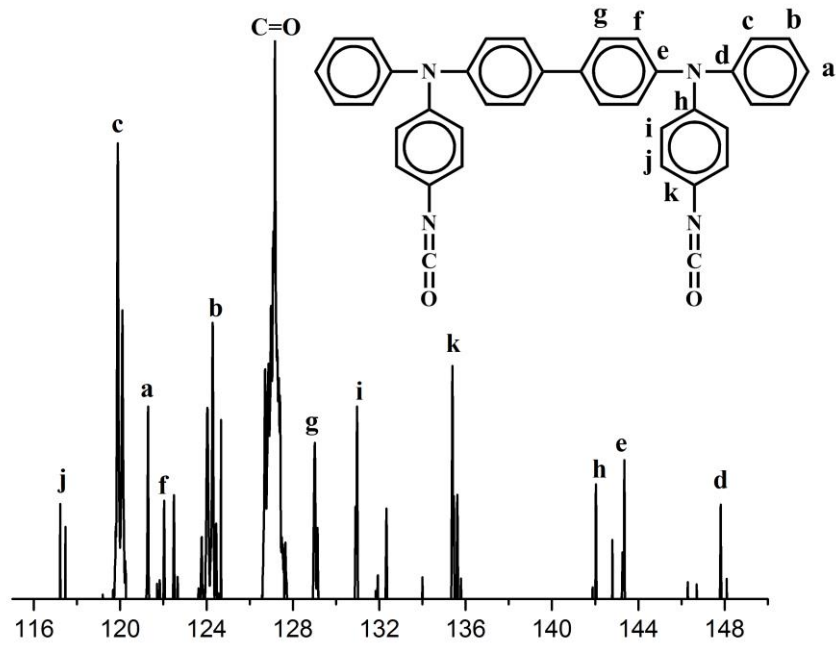

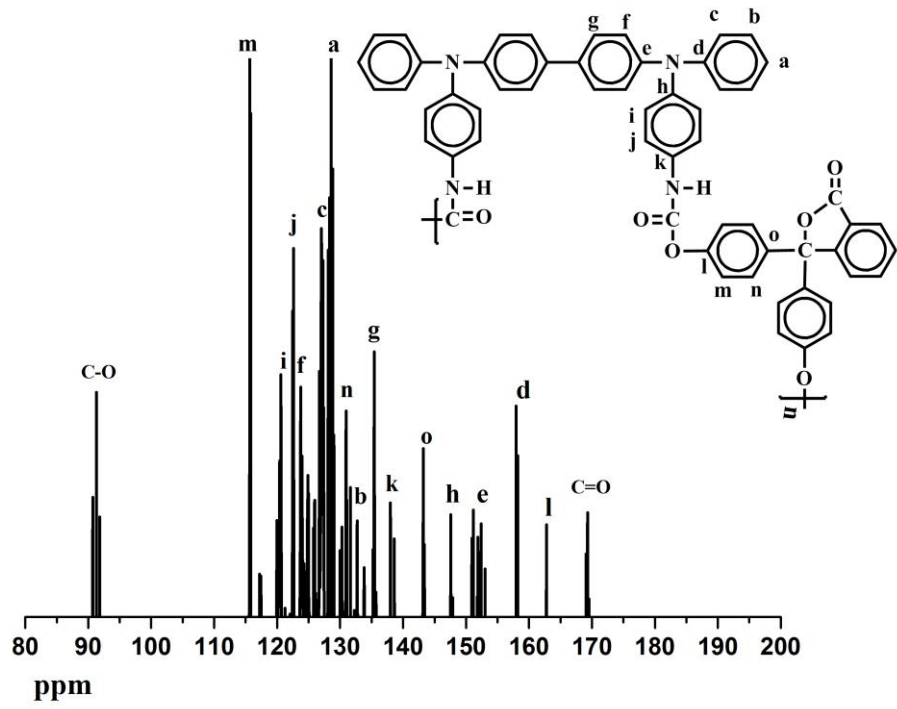

ii

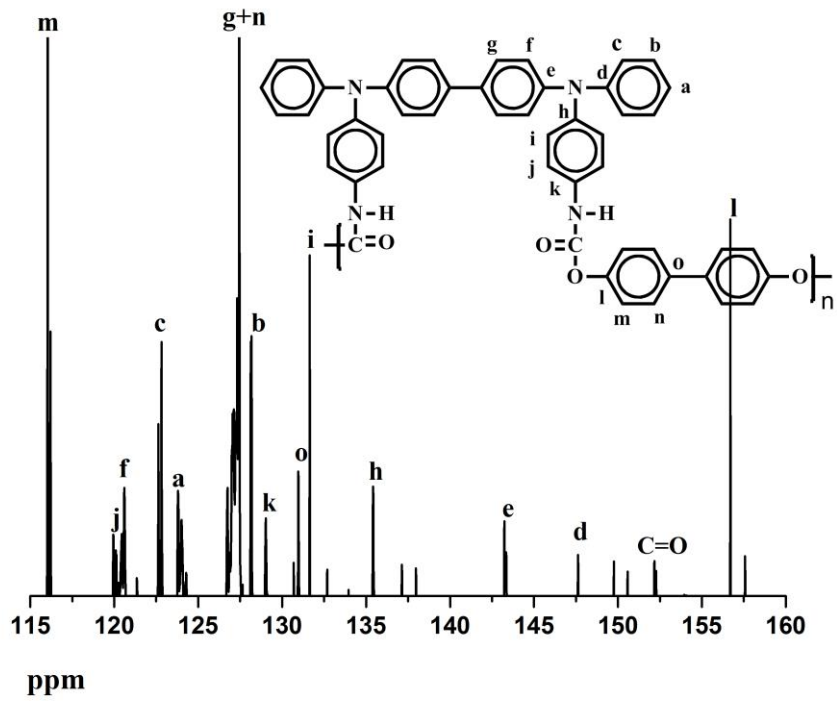

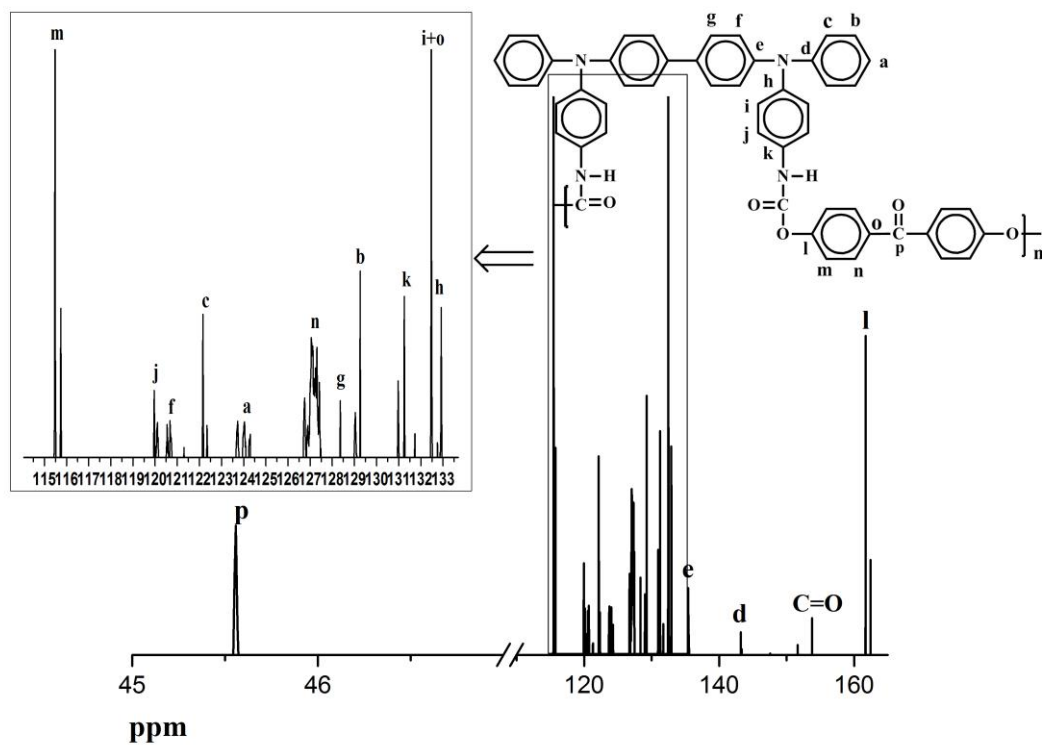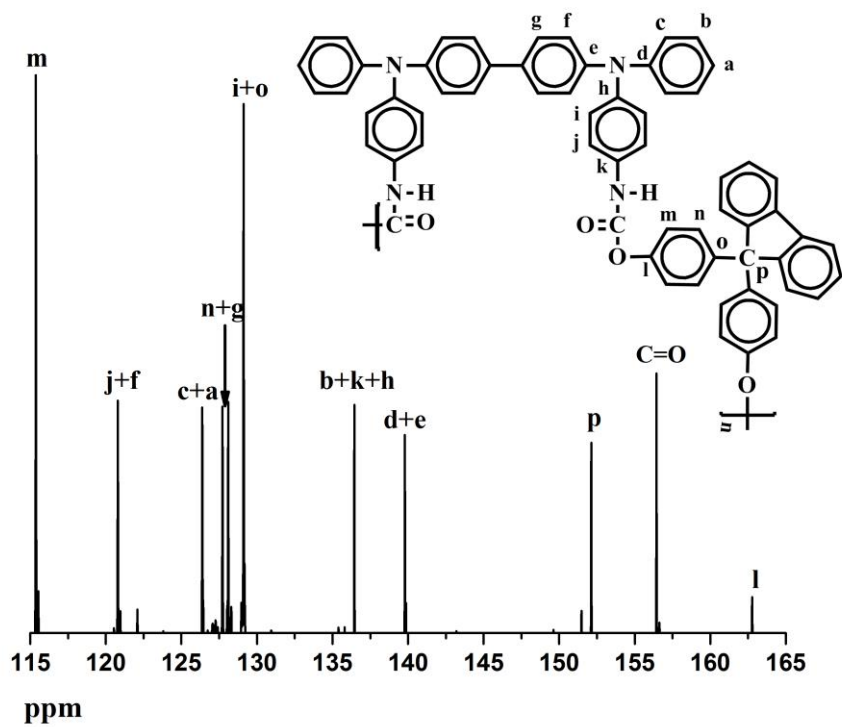

**Fig. S2** <sup>1</sup>H and <sup>13</sup>C NMR spectras of PUs (M1) and PUs (M2) in DMSO-d<sub>6</sub>.

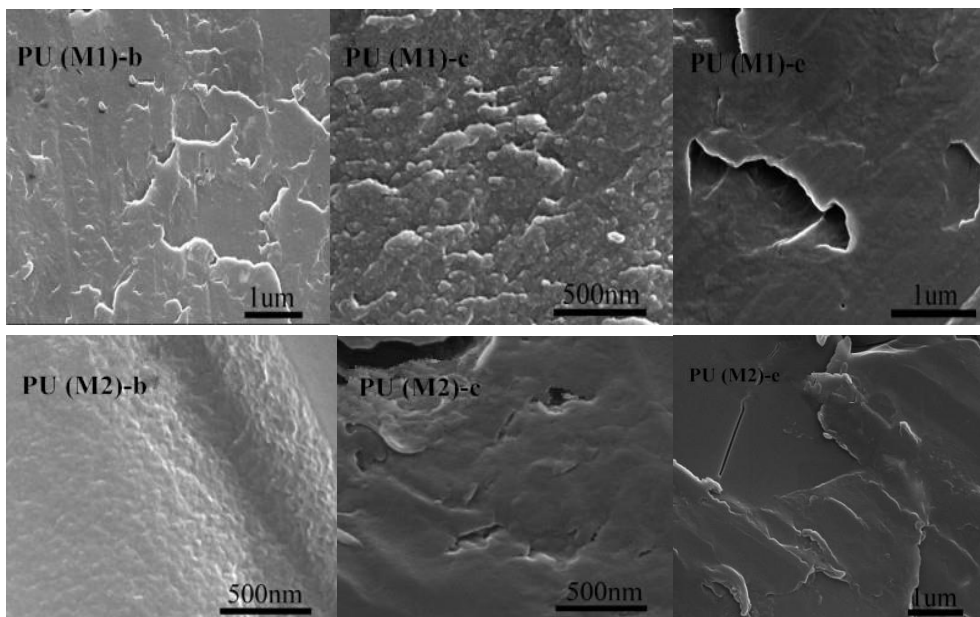

**Fig. S3** SEM images of other PUs (M1) and PUs (M2).

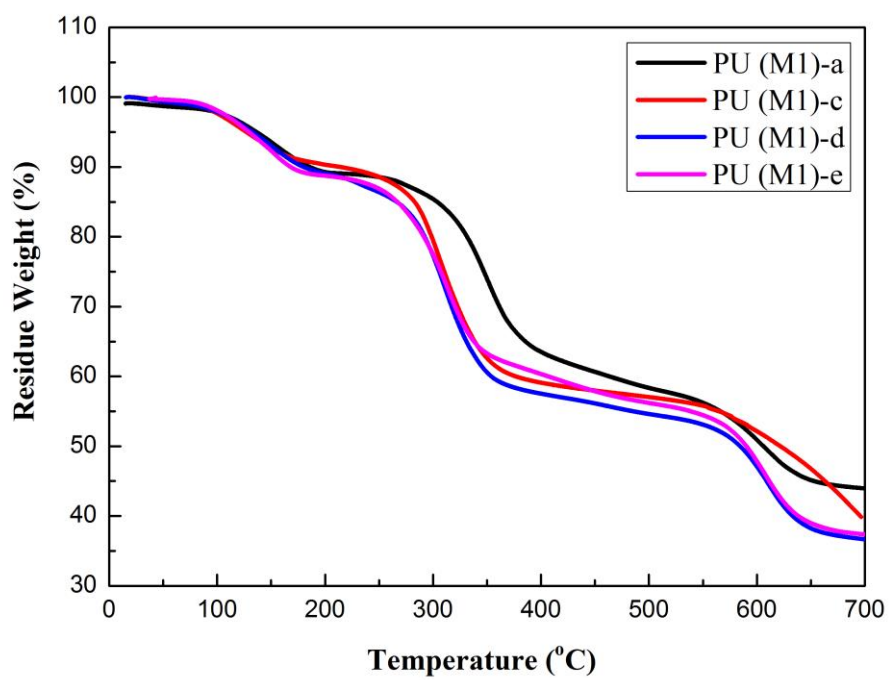

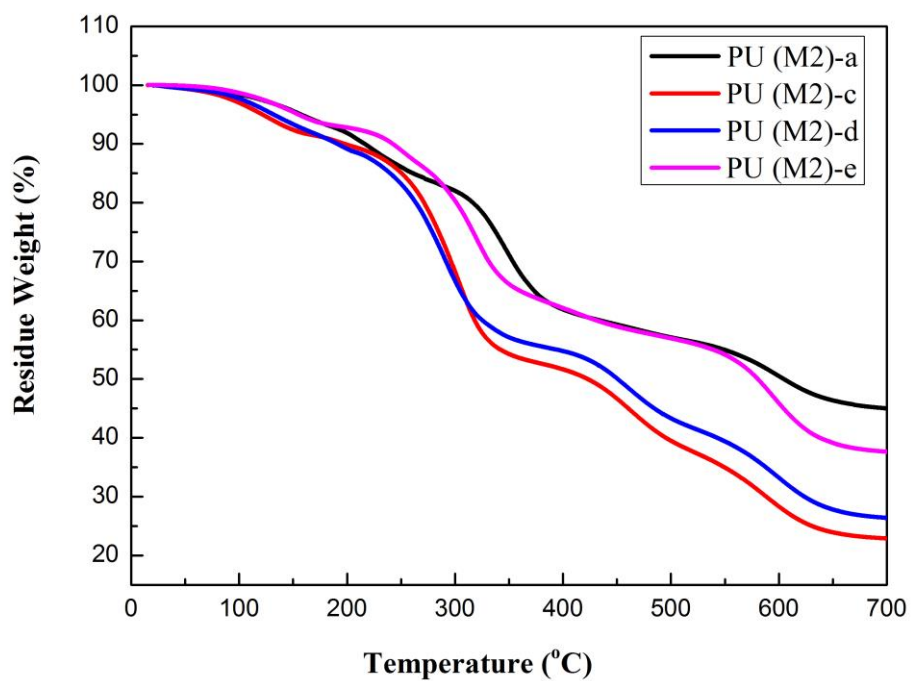

**Fig. S4** TGA traces of the PUs (M1) and PUs (M2).

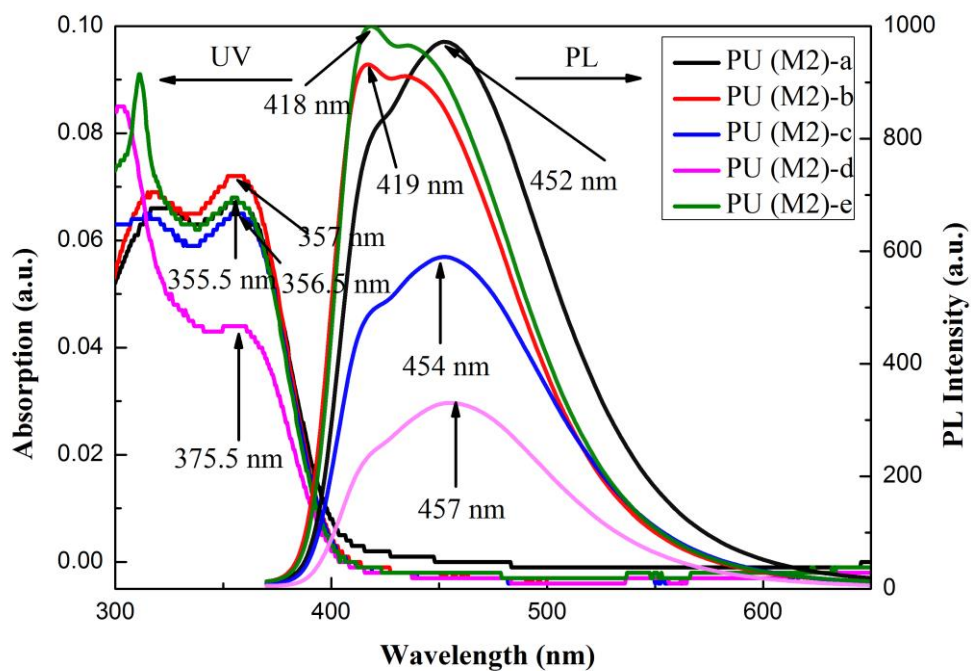

**Fig. S5** UV-vis absorption and PL spectra of PUs (M2) with a concentration of DMSO (conc.:  $10^{-8}$

M).

**Table S1** Molecular weights of the PUs.

|          | $M_n$ | $M_w$ | $M_z$ | $M_w/M_n$ | n  |
|----------|-------|-------|-------|-----------|----|
| PU(M1)-a | 10400 | 15500 | 21400 | 1.49      | 10 |
| PU(M1)-b | 11900 | 13200 | 14800 | 1.11      | 13 |
| PU(M1)-c | 12500 | 13600 | 14900 | 1.09      | 14 |
| PU(M1)-d | 11700 | 13100 | 15000 | 1.12      | 13 |
| PU(M1)-e | 11400 | 12100 | 13000 | 1.06      | 11 |
| PU(M2)-a | 13100 | 15200 | 18700 | 1.16      | 14 |
| PU(M2)-b | 10600 | 13200 | 16600 | 1.27      | 13 |
| PU(M2)-c | 10900 | 17100 | 26400 | 1.57      | 14 |
| PU(M2)-d | 10400 | 11000 | 12200 | 1.09      | 13 |
| PU(M2)-e | 10200 | 10400 | 10500 | 1.04      | 11 |

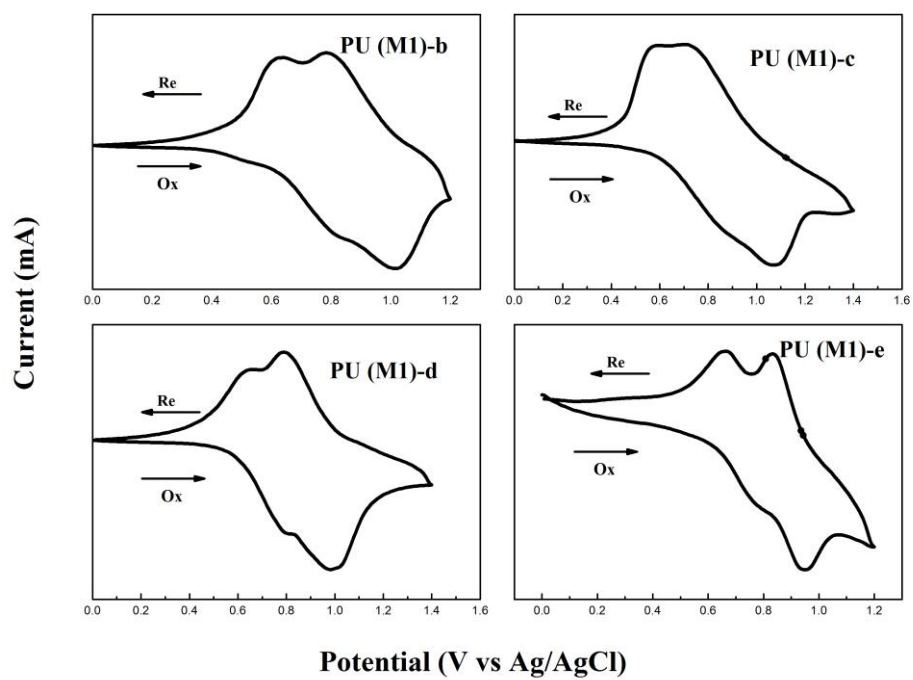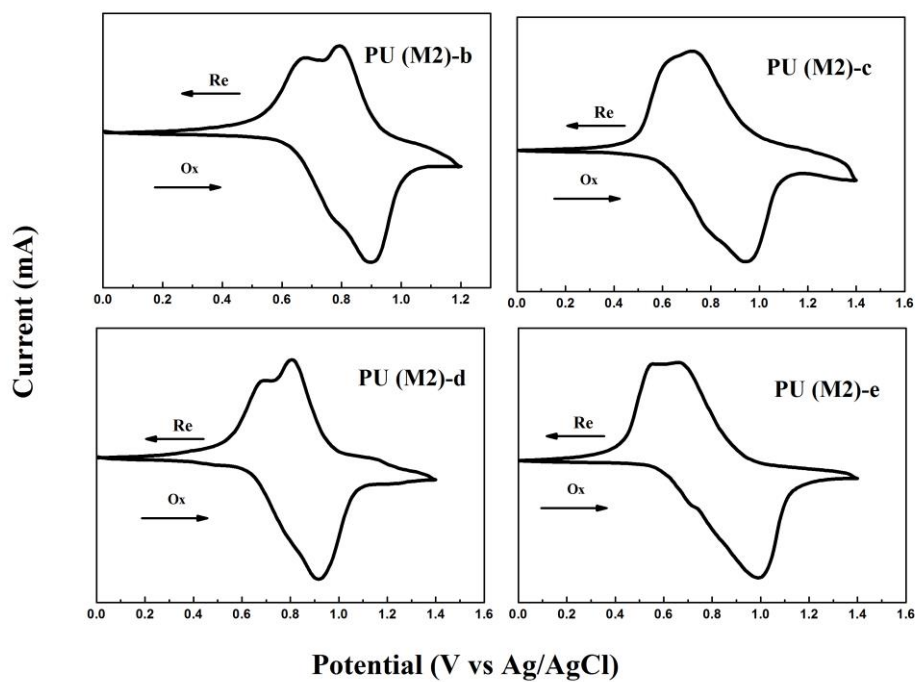

**Fig. S6** CVs for PUs (M1) and PUs (M2) in 0.1 M LiClO<sub>4</sub>/CH<sub>3</sub>CN at the scanning rate of 50

mV/s.



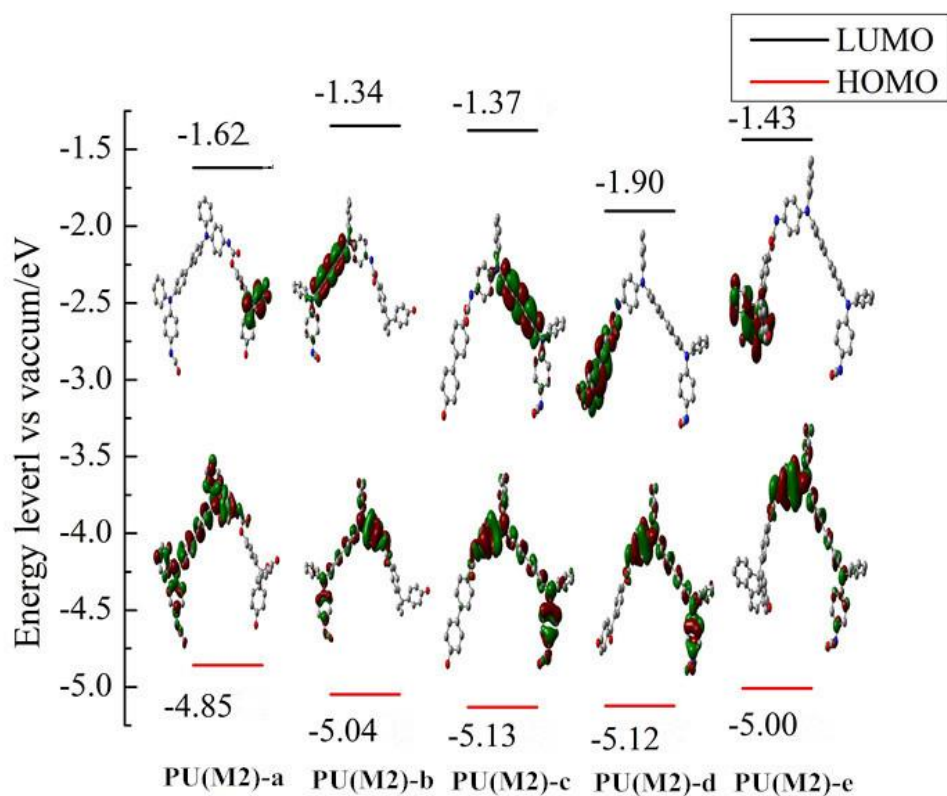

**Fig. S7** Pictorial representations of the electron density in the frontier molecular orbitals of repetition units for PUs (M2).

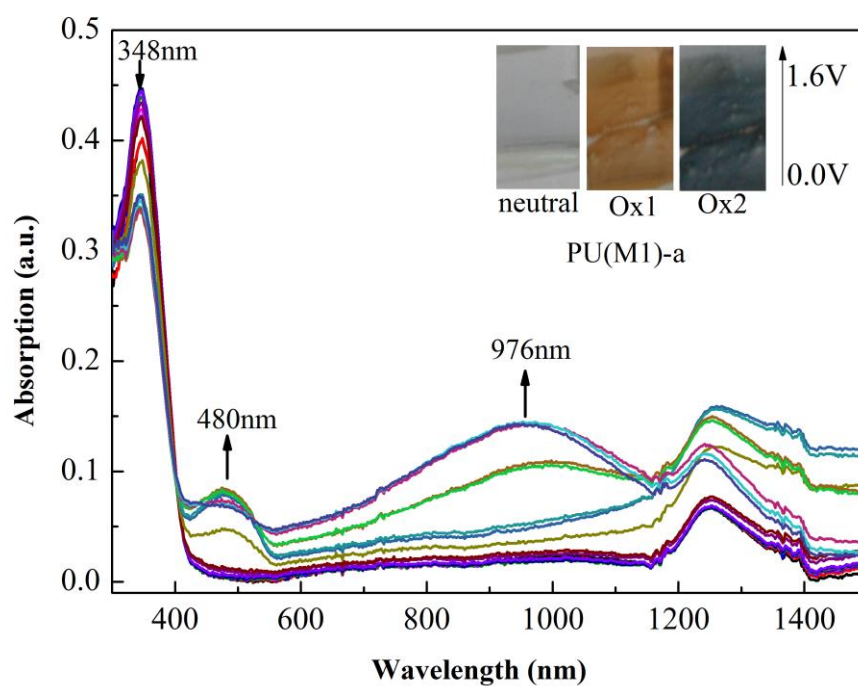

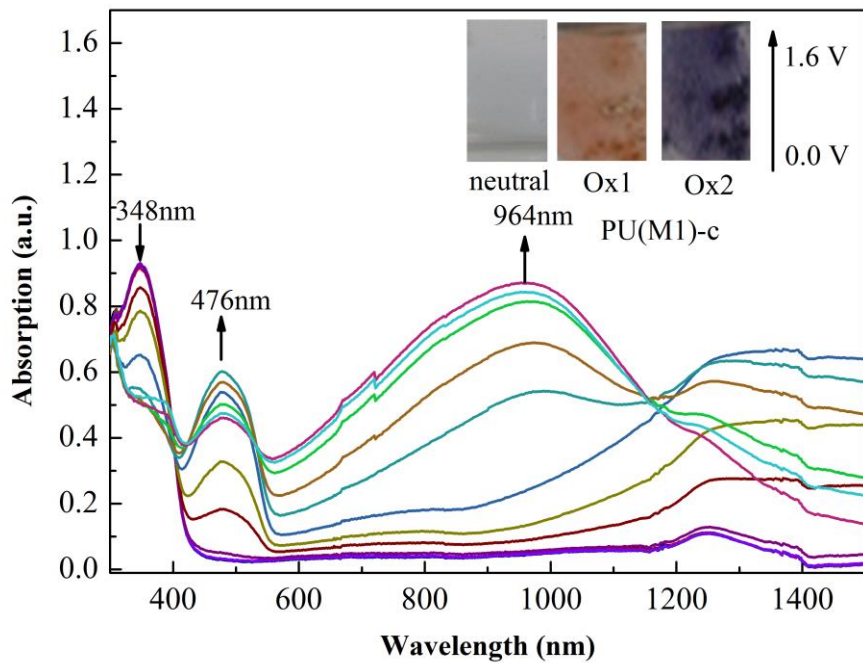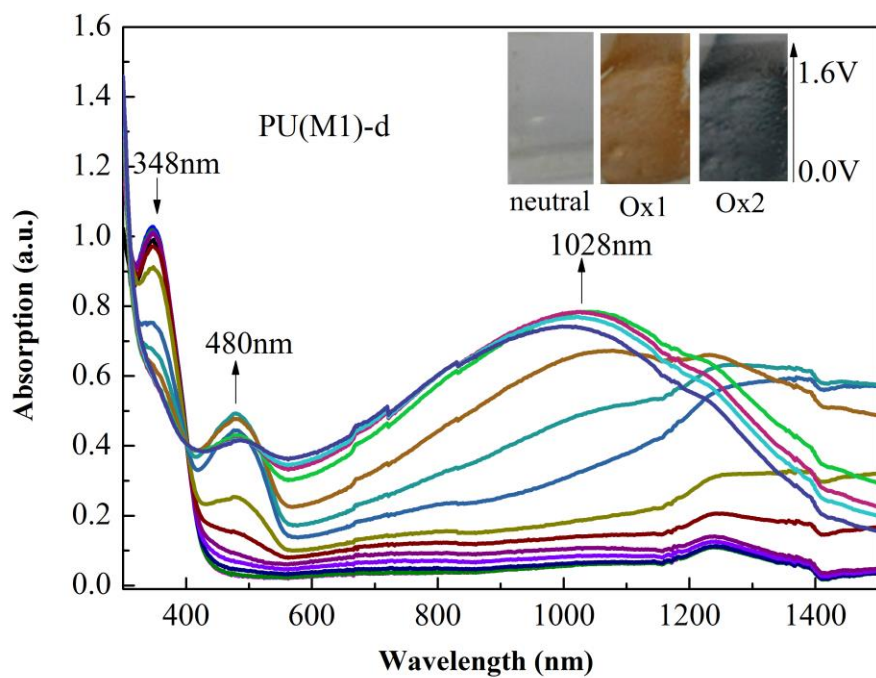

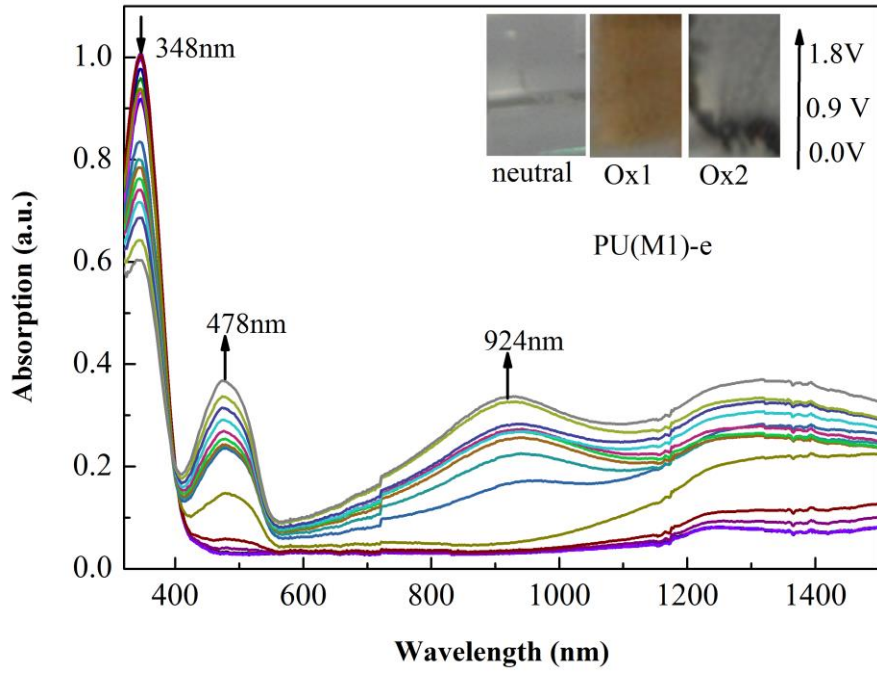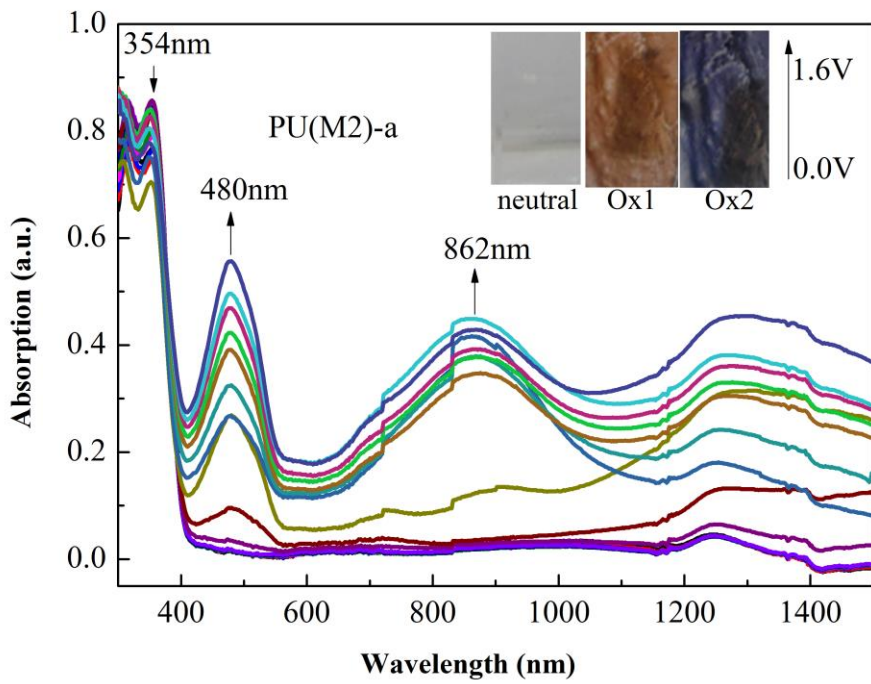

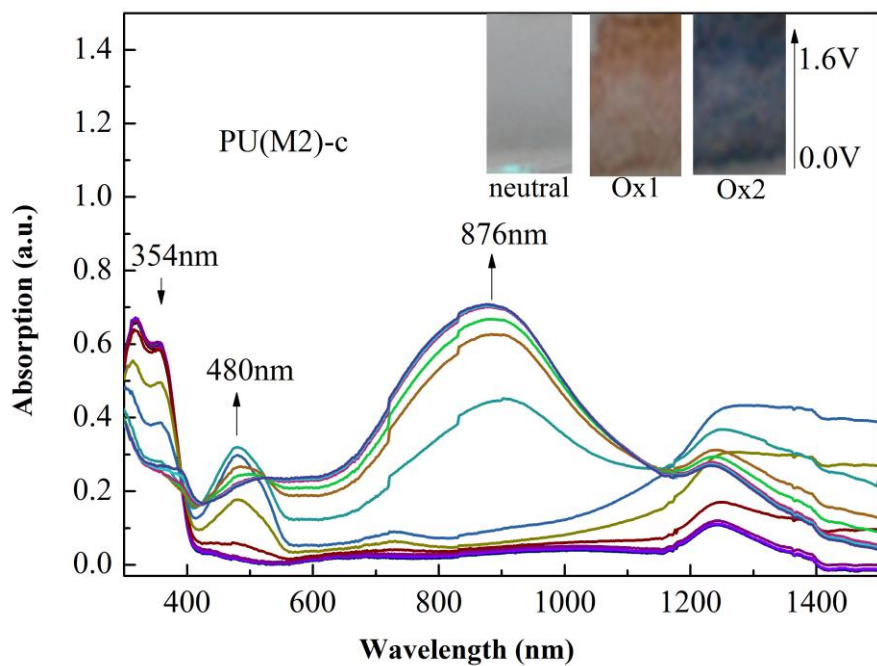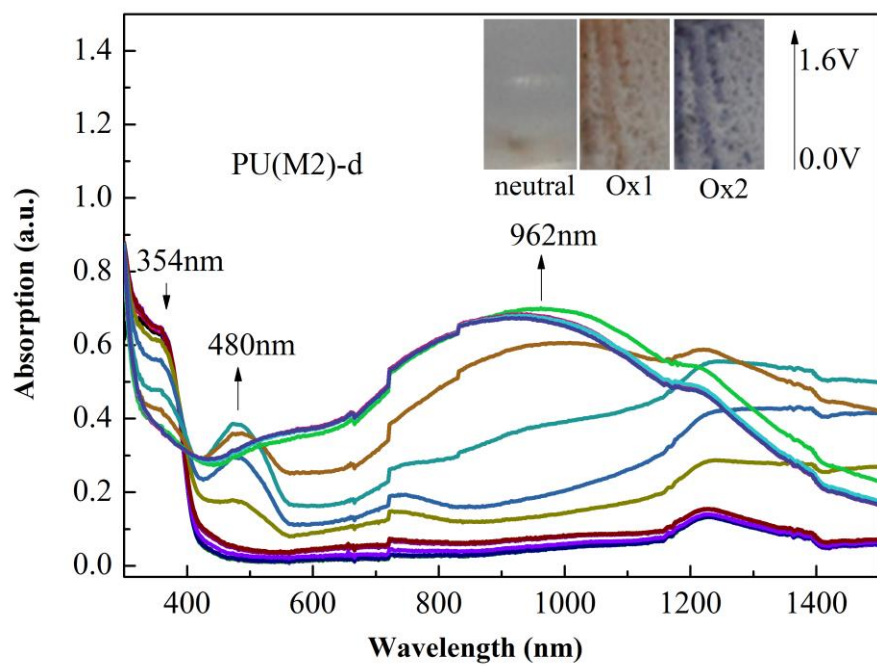

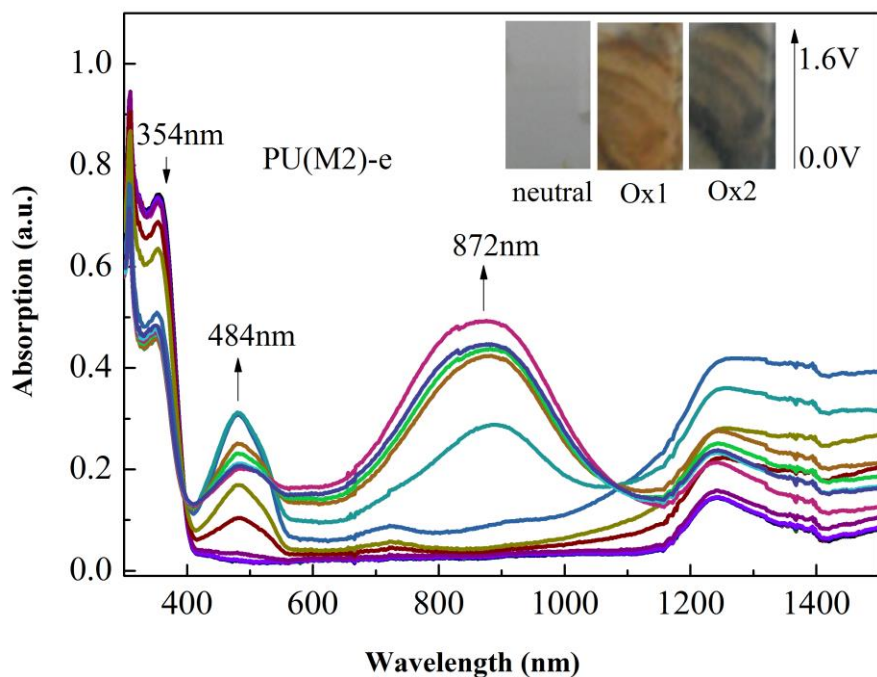

**Fig. S8** Electrochromic behaviors of PUs (M1) and PUs (M2) thin film in  $\text{CH}_3\text{CN}$  with 0.1 M  $\text{LiCO}_4$  as the supporting electrolyte (insets are the pictures of oxidized PUs).

**Table S2** Optical and Electrochemical Data Collected for Coloration Efficiency Measurements of polymers.

| Polymer code <sup>a</sup> | $\lambda$ (nm) <sup>b</sup> | $\delta_{\text{OD}}$ <sup>c</sup> | $Q(\text{mC}/\text{cm}^2)$ <sup>d</sup> | $\eta(\text{cm}^2/\text{C})$ <sup>e</sup> |
|---------------------------|-----------------------------|-----------------------------------|-----------------------------------------|-------------------------------------------|
| PU(M1)-a                  | 480                         | 0.309                             | 1.185                                   | 261.1                                     |
| PU(M1)-b                  | 476                         | 0.135                             | 1.044                                   | 129.6                                     |
| PU(M1)-c                  | 476                         | 0.134                             | 1.300                                   | 103.6                                     |
| PU(M1)-d                  | 480                         | 0.175                             | 1.053                                   | 166.5                                     |
| PU(M1)-e                  | 478                         | 0.267                             | 1.454                                   | 182.4                                     |
| PU(M2)-a                  | 480                         | 0.571                             | 3.418                                   | 167.3                                     |
| PU(M2)-b                  | 480                         | 0.550                             | 2.174                                   | 253.1                                     |

|          |     |       |       |       |
|----------|-----|-------|-------|-------|
| PU(M2)-c | 480 | 0.372 | 1.579 | 235.8 |
| PU(M2)-d | 480 | 0.549 | 1.927 | 285.0 |
| PU(M2)-e | 484 | 0.429 | 1.445 | 297.4 |

a the voltage 0 to 0.8 V (V vs. Ag/AgCl)

b the given wavelength

c the change of the optical density

d the amount of injected/ejected charge per unit sample area

e coloration efficiency  $\eta = \delta_{OD}/Q$ .

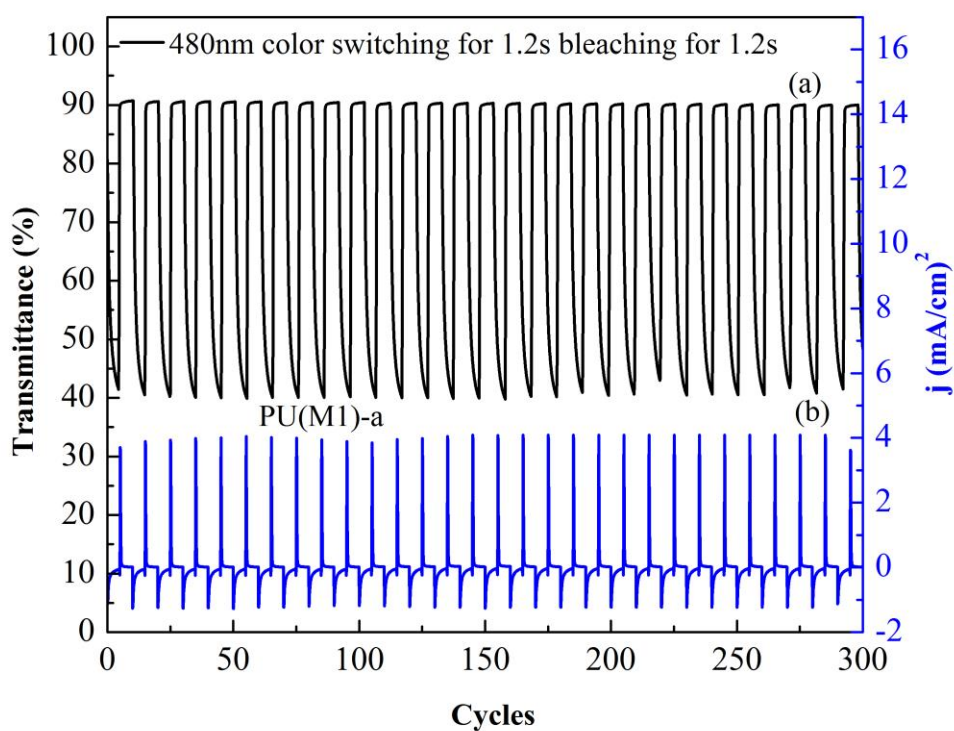

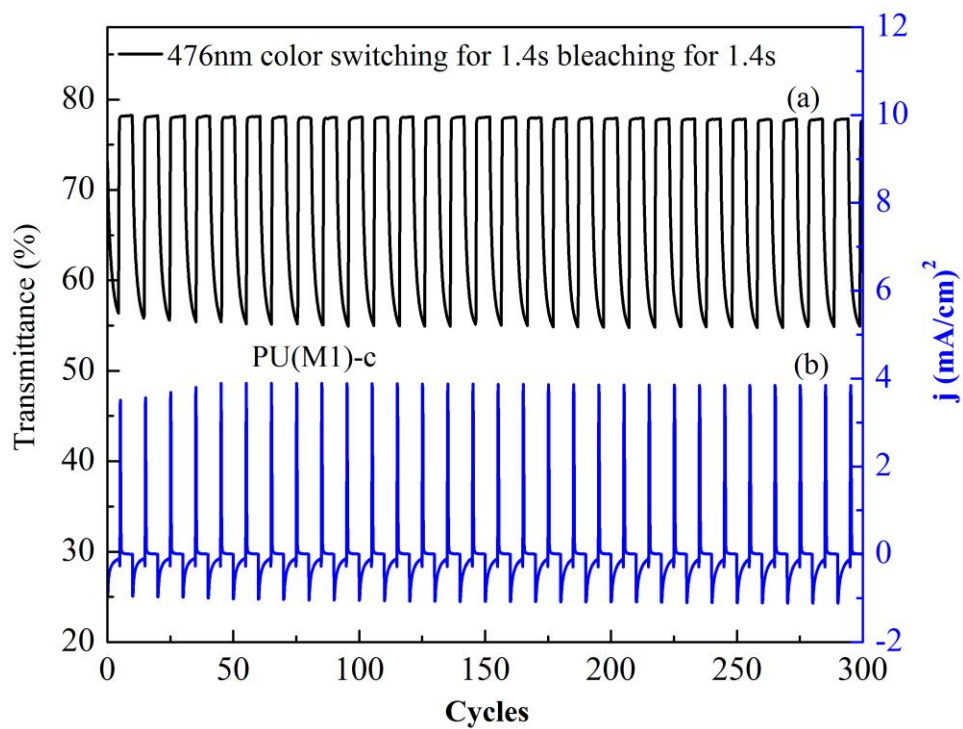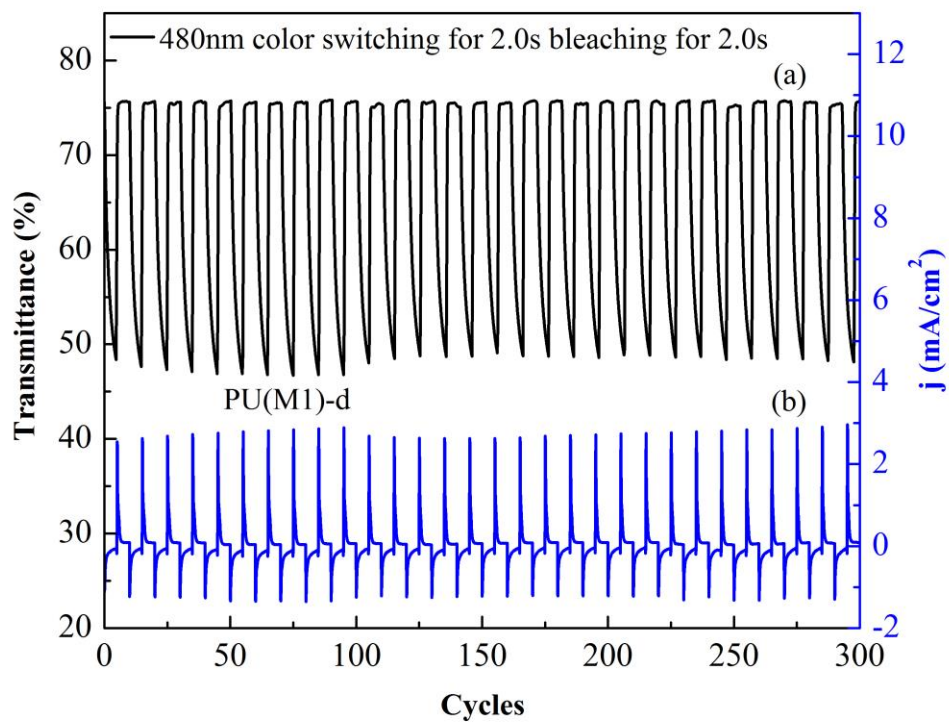

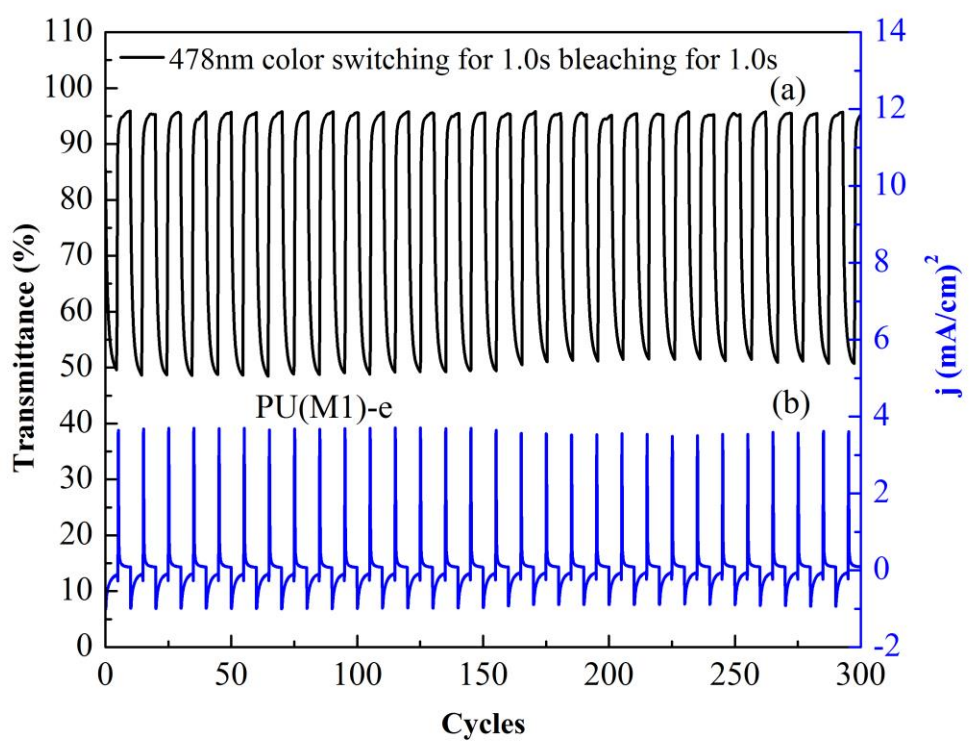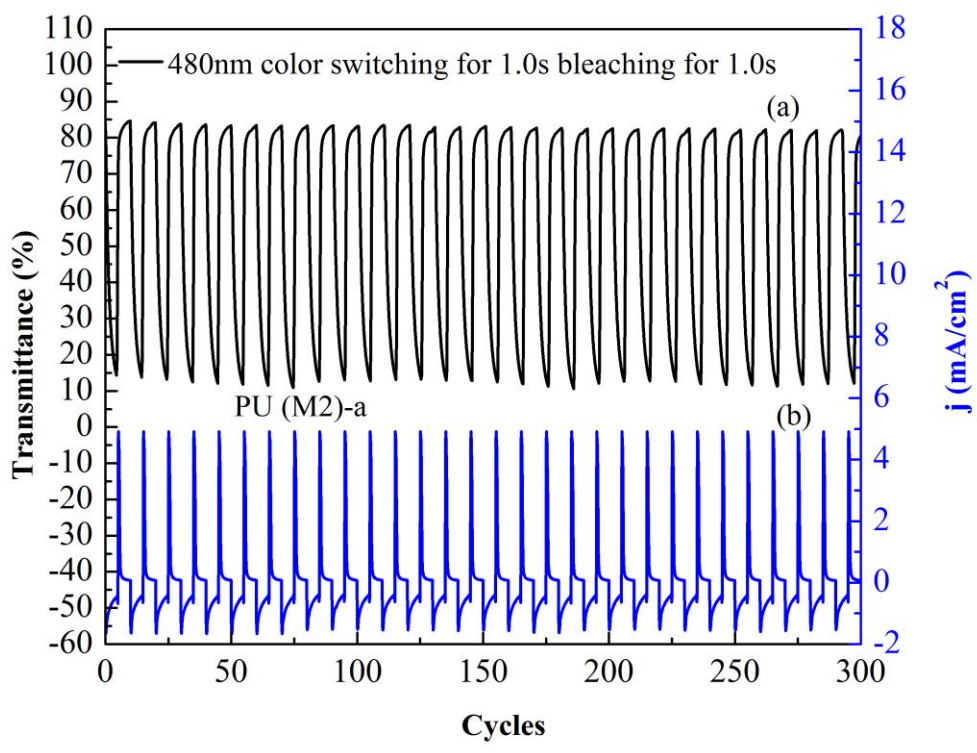



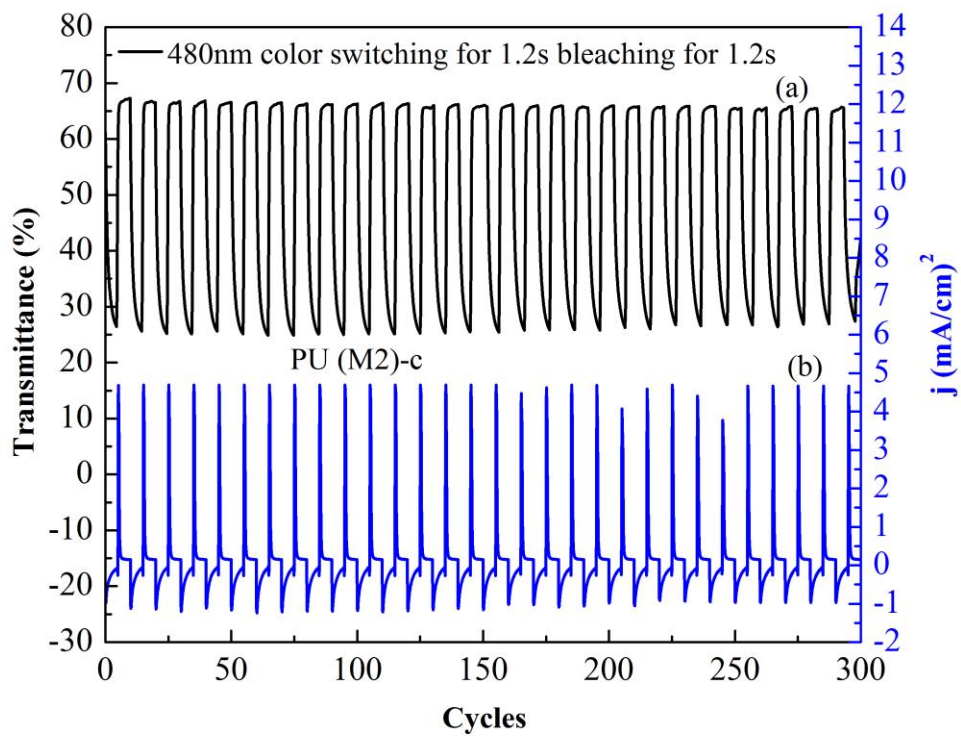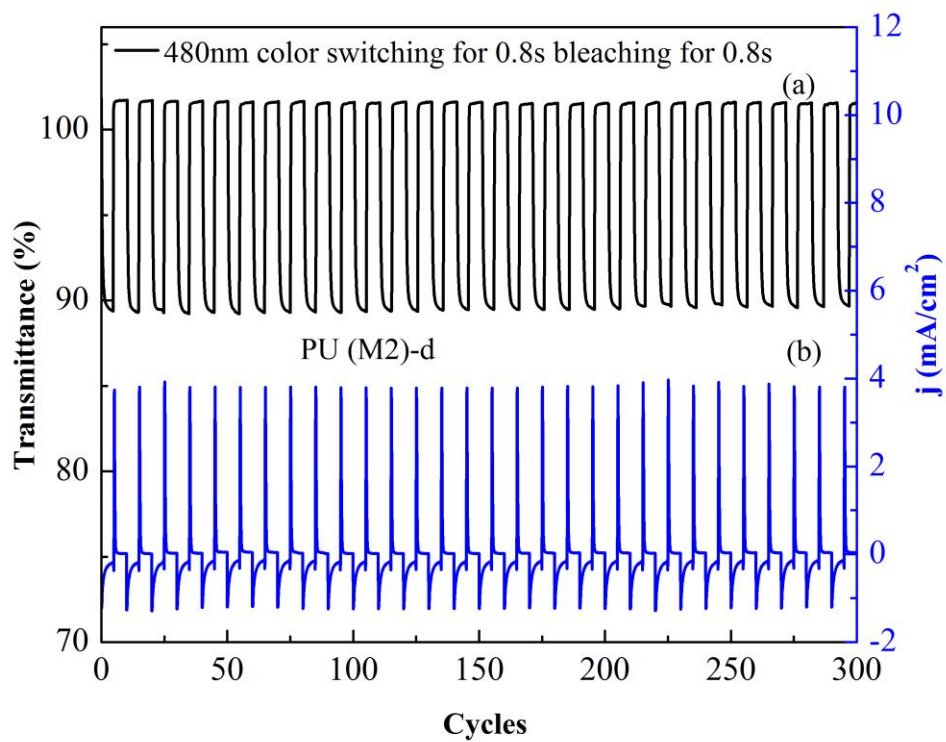

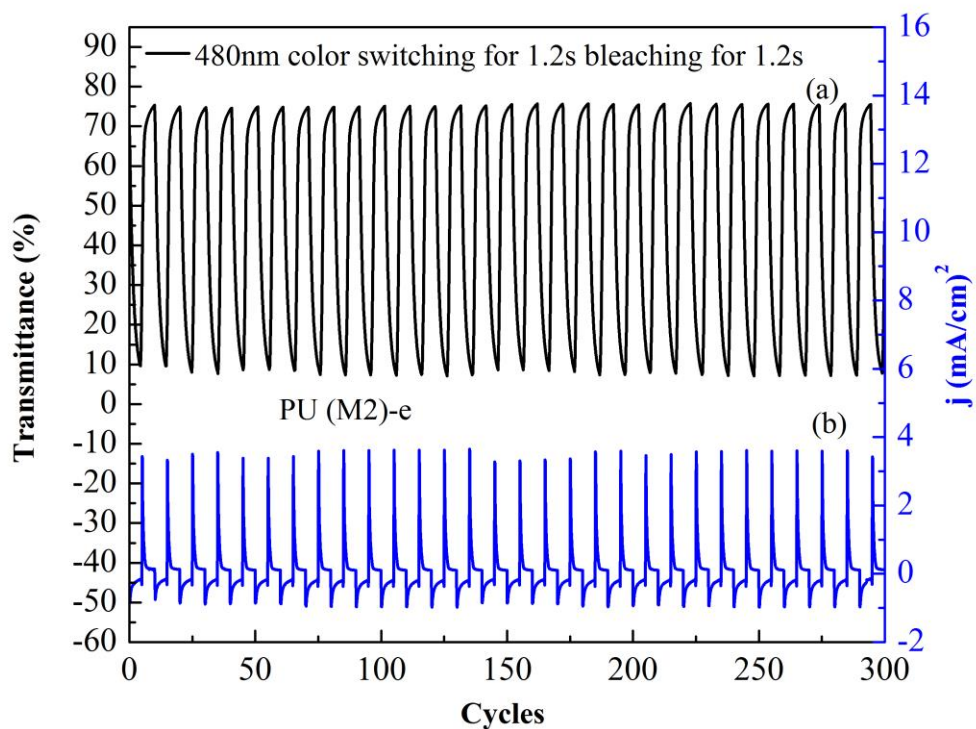

**Fig. S9** Optical switching procedures (0.1 M LiClO<sub>4</sub> as the supporting electrolyte with a cycle time of 10 s): (a) potential step transmittance of PUs (M1) and PUs (M2) by applying a potential step (0.0-0.8 V). (b) Current consumption of PUs (M1) and PUs (M2).
